# Supplementary material
Source: PubMed Central journal article supplement (PMC4140969)
Supplement: NIHMS608877-supplement-001610_-_Supplemental_Material.pdf [file NIHMS608877-supplement-001610_-_Supplemental_Material.pdf]

## SUPPLEMENTAL MATERIAL

**Supplemental Table 1. Characteristics of Cardiovascular Health Study Participants by Clinic Site, 1996-1997**

---

Among all individuals with measured levels of PIIINP

---

|                                         | Forsyth County,<br>North Carolina<br><br>N = 790 | Sacramento<br>County, California*<br><br>N = 909 | Washington<br>County, Maryland*<br><br>N = 692 | Pittsburgh,<br>Pennsylvania<br><br>N = 846 |
|-----------------------------------------|--------------------------------------------------|--------------------------------------------------|------------------------------------------------|--------------------------------------------|
| Age                                     | 78 (5)                                           | 78 (5)                                           | 78 (5)                                         | 78 (5)                                     |
| Male                                    | 39                                               | 41                                               | 39                                             | 43                                         |
| Body mass index<br>(kg/m <sup>2</sup> ) | 27 (5)                                           | 27 (5)                                           | 27 (5)                                         | 27 (5)                                     |
| Systolic blood<br>pressure (mmHg)       | 136 (21)                                         | 140 (20)                                         | 137 (21)                                       | 133 (20)                                   |
| PIIINP (μg/L)                           | 5.0 (1.8)                                        | 4.8 (1.7)                                        | 4.6 (1.9)                                      | 4.9 (1.7)                                  |

---

Abbreviations - Procollagen type III N-terminal propeptide (PIIINP), Transforming growth factor-β (TGF-β)

\* TGF-β was not measured at these sites.
